# Supplementary material for: NEIL1 and NEIL2 DNA glycosylases modulate anxiety and learning in a cooperative manner in mice
Source: PubMed Central journal article supplement (PMC8639745; doi:10.1038/s42003-021-02864-x), 2021-12-02
Supplement: 42003_2021_2864_MOESM3_ESM.pdf [file 42003_2021_2864_MOESM3_ESM.pdf]

## **Description of Additional Supplementary Files**

**File name:** Supplementary Data 1

**Description:** Figure source data (Fig. 1, 2b-c, 3 and Supplementary Figures 1, 2, 6 and 7)
